# Supplementary material
Source: publisher site journal article supplement (https://www.spandidos-publications.com/6391/downloadSupplementary)
Supplement: Supplementary file 1 [file downloadSupplementary]

## Sheet: Sheet1
Table SI. Clean 16S rDNA data of all samples.
Sa Mple	Raw tags	Raw bases	Valid tags	Valid bases	Valid (%)	Q20 (%)	Q30 (%)	GC (%)
AONFH_11	80929	40.46 M	62301	25.45 M	76.98	96.69	91.09	55.38
AONFH_12	85284	42.64 M	75595	31.32 M	88.64	96.99	91.98	55.99
AONFH_13	87965	43.98 M	77991	33.08 M	88.66	95.35	88.01	54.83
AONFH_14	84182	42.09 M	71840	30.21 M	85.34	97.07	92.08	55.41
AONFH_15	80547	40.27 M	61420	25.07 M	76.25	96.94	91.82	53.93
AONFH_16	81942	40.97 M	59338	24.56 M	72.41	96.57	90.65	53.31
AONFH_17	62700	31.35 M	57870	23.47 M	92.3	95.43	88.06	53.82
AONFH_18	85180	42.59 M	65611	26.77 M	77.03	97.12	92.19	56.15
AONFH_19	80718	40.36 M	58539	24.00 M	72.52	96.69	91.36	53.39
AONFH_20	87299	43.65 M	67575	27.79 M	77.41	96.61	91.14	54.17
AONFH_21	87355	43.68 M	70954	29.01 M	81.22	93.55	84.15	56.96
NC_22	60030	30.02 M	54015	21.93 M	89.98	96.46	90.89	53.91
AONFH_22	81823	40.91 M	65184	27.16 M	79.66	96.72	91.39	53.62
AONFH_23	82763	41.38 M	63582	26.13 M	76.82	96.26	89.92	55.34
AONFH_24	84990	42.49 M	67544	27.55 M	79.47	95.33	87.94	54.69
AONFH_25	85662	42.83 M	64090	26.40 M	74.82	96.9	91.81	54.5
AONFH_26	86657	43.33 M	67196	27.46 M	77.54	97.08	92.08	53.54
AONFH_27	83933	41.97 M	71558	30.03 M	85.26	96.8	91.49	55.46
AONFH_28	81731	40.87 M	65674	27.67 M	80.35	95.53	88.31	54.72
AONFH_29	86311	43.16 M	64821	26.43 M	75.1	96.81	91.52	55.41
AONFH_30	87416	43.71 M	74296	31.40 M	84.99	96.98	91.88	54.82
AONFH_31	80513	40.26 M	66443	27.46 M	82.52	96.61	90.61	56.63
AONFH_32	80041	40.02 M	68340	28.06 M	85.38	96.2	89.78	52.93
AONFH_33	84180	42.09 M	68538	28.97 M	81.42	97.1	92.14	55.3
AONFH_34	87839	43.92 M	77118	31.92 M	87.79	97.03	92.06	56.69
AONFH_35	84873	42.44 M	70755	29.46 M	83.37	96.71	91.23	56.45
AONFH_36	82054	41.03 M	64666	26.25 M	78.81	95.03	87.22	53.3
AONFH_37	84101	42.05 M	65910	27.43 M	78.37	96.83	91.53	54.46
AONFH_38	80392	40.20 M	68131	28.92 M	84.75	97.03	92.11	55.54
AONFH_39	86504	43.25 M	66002	27.09 M	76.3	96.18	89.64	53.49
AONFH_40	82178	41.09 M	73033	29.91 M	88.87	96.84	91.39	57.79
AONFH_41	86285	43.14 M	66492	27.37 M	77.06	97.17	92.39	55.77
AONFH_42	87919	43.96 M	72119	30.08 M	82.03	96.65	91.11	53.5
AONFH_43	64606	32.30 M	59111	24.16 M	91.49	96.55	90.79	52.04
AONFH_44	85010	42.51 M	70994	28.94 M	83.51	95.06	87.25	54.9
NC_11	85159	42.58 M	69891	28.85 M	82.07	96.69	91.2	54.76
NC_12	82642	41.32 M	61080	25.02 M	73.91	97.04	92.08	55.47
NC_13	72294	36.15 M	56940	23.55 M	78.76	89.29	76.18	54.57
NC_14	86447	43.22 M	77663	32.29 M	89.84	96.56	90.64	54.27
NC_15	83969	41.98 M	72551	29.73 M	86.4	97.26	92.56	57.21
NC_16	82948	41.47 M	75015	30.82 M	90.44	96.89	91.8	58.46
NC_17	86444	43.22 M	72245	29.65 M	83.57	96.74	91.39	52.94
NC_18	63951	31.98 M	57389	23.60 M	89.74	95.67	88.7	52.76
NC_19	82701	41.35 M	67741	27.66 M	81.91	96.81	91.51	53.64
NC_20	80687	40.34 M	70825	29.04 M	87.78	97.24	92.59	56.95
NC_21	81530	40.77 M	64700	26.37 M	79.36	96.96	91.7	55.64
NC_23	81760	40.88 M	63289	26.44 M	77.41	96.6	90.88	54.11
NC_24	84058	42.03 M	61811	25.16 M	73.53	97.19	92.43	54.48
NC_25	85442	42.72 M	66151	26.89 M	77.42	96.7	91.12	52.59
NC_26	86207	43.10 M	74944	31.57 M	86.93	96.82	91.56	54.43
NC_27	81531	40.77 M	68100	28.56 M	83.53	94.91	87.04	53.24
NC_28	80487	40.24 M	61290	25.13 M	76.15	96.81	91.45	53.68
NC_29	80839	40.42 M	68275	28.36 M	84.46	96.89	91.51	56.63
NC_30	87704	43.85 M	68547	28.41 M	78.16	96.9	91.5	55.41
NC_31	87664	43.83 M	77149	31.78 M	88.01	96.18	89.65	57.03
AONFH_45	82906	41.45 M	62175	25.25 M	74.99	97.14	92.24	51.84
NC_32	86032	43.02 M	70416	29.13 M	81.85	96.53	90.77	53.26
NC_33	87796	43.90 M	65023	26.47 M	74.06	96.57	91	53.62
NC_34	80218	40.11 M	66517	27.75 M	82.92	94.1	85.5	54.47
NC_35	85507	42.75 M	66966	27.42 M	78.32	96.58	90.95	54.19
NC_36	87304	43.65 M	65280	26.64 M	74.77	96.88	91.71	53.15
NC_37	82723	41.36 M	59426	24.74 M	71.84	95.28	87.73	54.39
NC_38	84655	42.33 M	69622	28.51 M	82.24	96.24	90.03	55.93
NC_39	86763	43.38 M	69784	28.49 M	80.43	97.21	92.46	56.94
NC_40	86689	43.34 M	61174	24.87 M	70.57	96.4	90.56	53.11
NC_41	84589	42.29 M	65551	26.69 M	77.49	96.82	91.52	53.67
AONFH_46	84589	42.29 M	70944	29.42 M	83.87	91.99	81.52	56.68
AONFH_47	81987	40.99 M	62139	25.70 M	75.79	96.59	91.03	53.23
AONFH_48	82151	41.08 M	65714	26.69 M	79.99	97.09	92.21	53.29
NC_42	81156	40.58 M	57537	23.38 M	70.9	96.37	90.17	53.06
NC_43	59019	29.51 M	53922	22.24 M	91.36	95.11	87.46	53.37
NC_44	83912	41.96 M	59550	24.34 M	70.97	97.01	92	54.53
AONFH_49	87102	43.55 M	75210	30.86 M	86.35	96.67	91.16	57.97
NC_45	83060	41.53 M	71813	29.54 M	86.46	94.63	86.37	57.98
AONFH_50	66132	33.07 M	54410	22.35 M	82.27	91.4	80.25	52.91
NC_46	86211	43.11 M	71885	29.48 M	83.38	96.4	90.53	56.24
NC_47	81079	40.54 M	63357	26.07 M	78.14	96.53	90.81	54.53
NC_48	87485	43.74 M	65648	27.76 M	75.04	95.55	88.51	51.99
NC_49	60475	30.24 M	54613	22.33 M	90.31	95.95	89.37	54.03
NC_50	80523	40.26 M	56795	23.15 M	70.53	96.82	91.49	54.05
AONFH_1	87003	43.50 M	76686	31.44 M	88.14	96.23	89.31	57.79
NC_1	84732	42.37 M	62076	25.34 M	73.26	97.13	91.48	54.17
AONFH_2	82282	41.14 M	69959	28.73 M	85.02	96.75	90.75	56.9
AONFH_3	82998	41.50 M	65263	26.84 M	78.63	97.43	92.19	54.15
AONFH_4	84888	42.44 M	67953	27.87 M	80.05	96.08	89.14	57.28
AONFH_5	81662	40.83 M	59601	24.21 M	72.98	97.07	91.43	55.16
AONFH_6	82251	41.13 M	66697	27.16 M	81.09	97.16	91.74	55.18
AONFH_7	87095	43.55 M	65474	26.78 M	75.18	94.73	85.87	58.09
AONFH_8	84507	42.25 M	72395	29.61 M	85.67	97.32	92.03	58.05
NC_2	58331	29.17 M	55917	22.91 M	95.86	95.99	88.81	54.4
NC_3	87741	43.87 M	65745	26.73 M	74.93	96.25	89.5	55.13
AONFH_9	68400	34.20 M	56885	23.29 M	83.17	95.69	87.94	53.01
NC_4	86256	43.13 M	69475	28.46 M	80.55	95.21	87.3	56.1
NC_5	84693	42.35 M	68016	27.81 M	80.31	96.03	88.9	57.44
AONFH_10	58781	29.39 M	56023	22.86 M	95.31	96.4	89.74	55.15
NC_6	87848	43.92 M	62933	25.76 M	71.64	96.72	90.58	52.7
NC_7	86985	43.49 M	77125	31.54 M	88.66	96.18	89.12	57.77
NC_8	81619	40.81 M	73339	30.11 M	89.86	95.9	88.61	58.56
M, Million; AONFH, alcohol-induced osteonecrosis of the femoral head; NC, negative NC; Q20(%): The percentage of bases with quality ≥20; Q30(%): The percentage of bases with quality ≥30; GC(%): The percentage of G and C bases.
